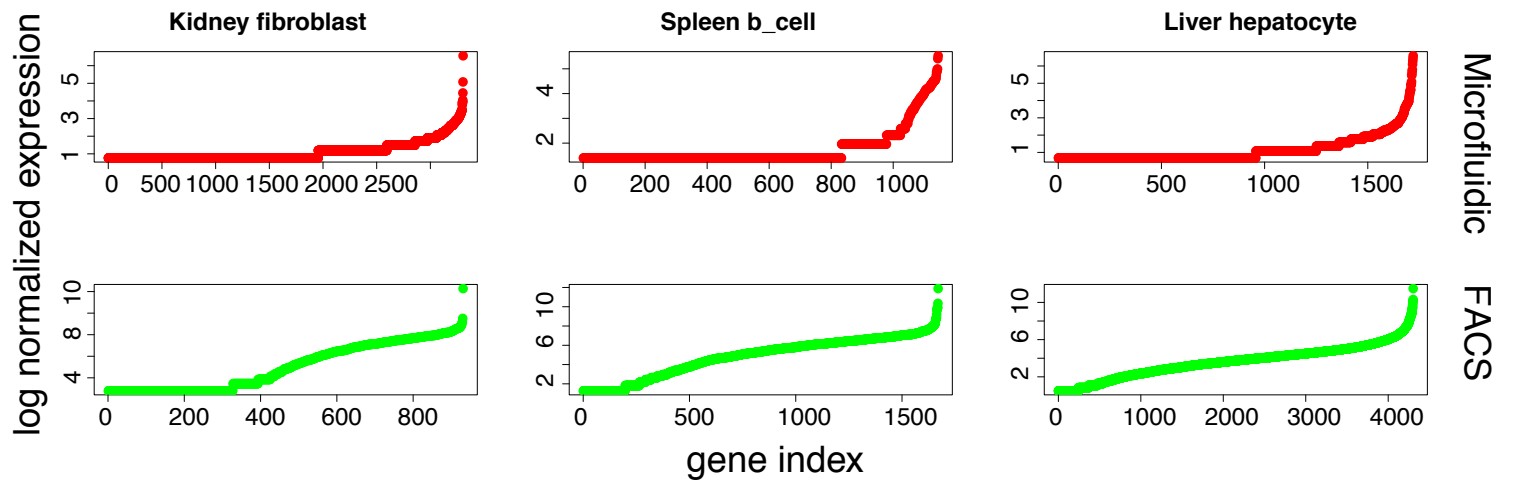

Supplementary Figure 4.
